# Supplementary material for: An unprecedented 3-D SHG MOF material of silver(i) induced by chiral triple helices
Source: Royal Society of Chemistry journal article supplement (doi:10.1039/c3cc40516h), 2013-01-01
Supplement: c3cc40516h.pdf [file c3cc40516h.pdf]

Electronic Supplementary Information

## Unprecedented 3-D SHG MOF Material of Silver (I) Induced by Chiral Triple helices

Huan Yang<sup>a,b</sup>, Rui-Li Sang<sup>a</sup>, Xiang Xu<sup>a</sup>, Li Xu<sup>\*a</sup>

### General Information

Commercially available reagents were used as received without further purification. Elemental analyses (C, H, N) were performed with a vario MICRO elemental analyzer. Thermal gravimetric analysis was performed under N<sub>2</sub> on a STA449C-QMS403C instrument. The measurements of SHG were carried out on the sieved powder samples by using the Kurtz and Perry method with a 2.05 μm Q-switch laser. The SHG intensity has been shown to depend strongly on particle size, thus the sample of Ag-AMIDN was grounded and sieved into several distinct particle size ranges (25-45, 45-53, 53-75, 75-105, 105-150, 150-210 and 210-300μm).

### Experimental Section

**Synthesis of 1:** A mixture of AgNO<sub>3</sub>, HAMIDN and H<sub>2</sub>O was sealed into a glassed plate and heated at 90°C for 3 days and then cooled to room temperature for 1 day. Colorless prism crystals were obtained in 55% yield (based on AgNO<sub>3</sub>). Anal. Calcd for C<sub>5</sub>H<sub>2</sub>AgN<sub>5</sub>: C, 25.03; H, 0.84; N, 29.18; Found: C, 25.37; H, 0.89; N 29.76.

### Crystallographic Analyses

The intensity data were collected on a Saturn 724 CCD diffractometer for 1, with graphite-monochromated MoK<sub>α</sub> radiation ( $\lambda = 0.71073 \text{ \AA}$ ) at room temperature. The structure was solved by direct methods and refined by full-matrix least squares on  $F^2$  with the SHELXTL-97 program. CCDC-880870 contain the supplementary crystallographic data for this paper, these data can be obtained free of charge from the Cambridge Crystallographic Data Centre via [www.ccdc.cam.ac.uk/data\\_request/cif](http://www.ccdc.cam.ac.uk/data_request/cif).

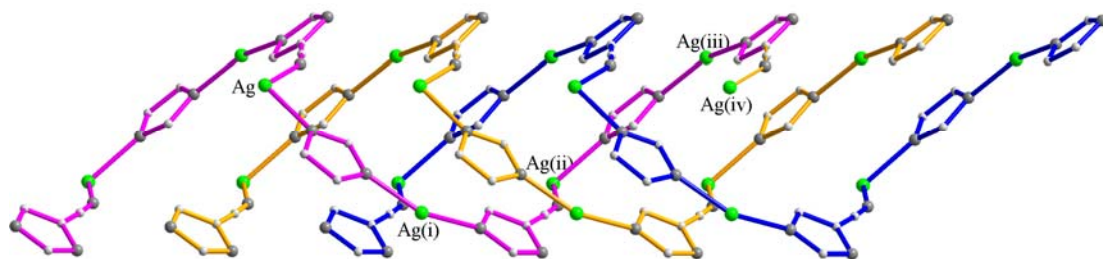

**Fig. S1** Triple right-handed (T-R) helices showing symmetry operations from Ag ( $x, y, z$ ), Ag(i) ( $-0.5+x, 2.5-y, 1+z$ ), Ag(ii) ( $1-x, 2-y, 1.5+z$ ), Ag(iii) ( $1.5-x, -0.5+y, 2.5+z$ ) to Ag(iv)( $x, y, 3+z$ ).

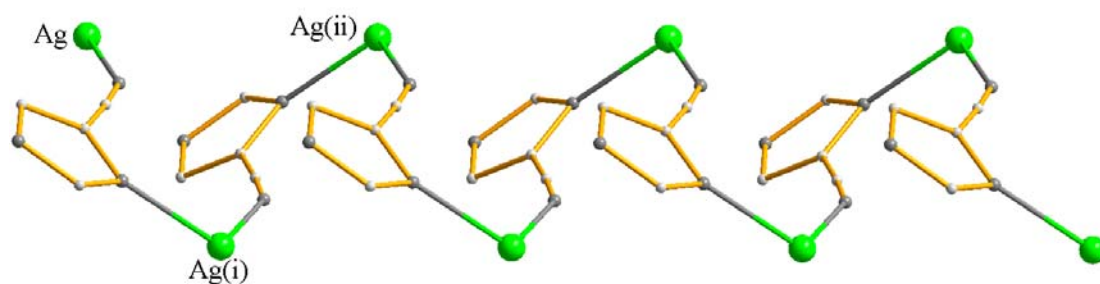

**Fig. S2** Single right-handed (S-R) helix. Ag,  $x, y, z$ ; Ag(i),  $2-x, 2-y, 0.5+z$ ; Ag(ii),  $x, y, 1+z$ .

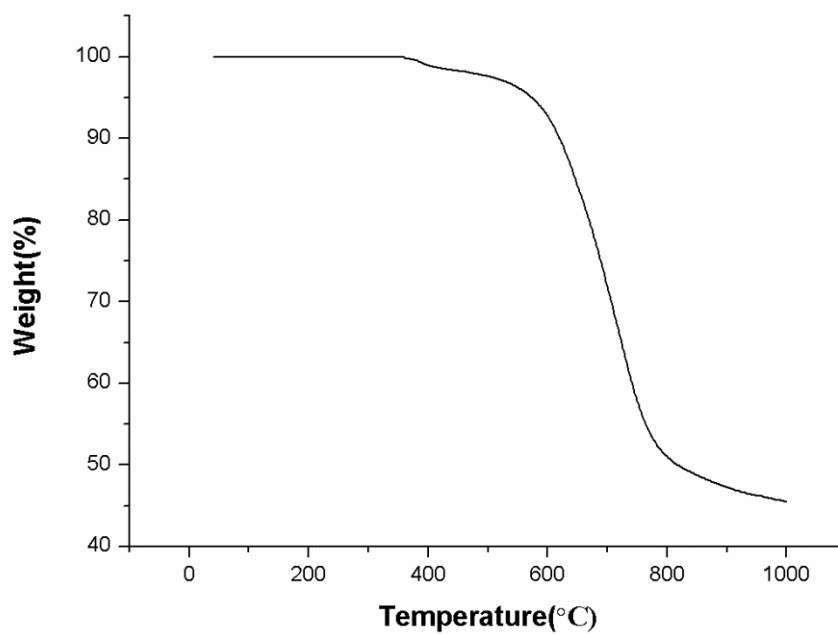

**Fig. S3.** TGA for Ag-Amidn (**1**)
